# Supplementary material for: A Novel Mutation of the Calcium-Sensing Receptor Gene Causing Familial Hypocalciuric Hypercalcemia Complicates Medical Followup after Roux-en-Y Gastric Bypass: A Case Report and a Summary of Mutations Found in the Same Hospital Laboratory
Source: Hindawi journal article supplement (doi:10.1155/2019/9468252), 2019-02-13
Supplement: f1 [file 9468252.f1.pdf]

Supplementary table S1. All mutations found at our hospital laboratory between 2005-2018, their associated phenotypes, in silico predictions and references to the literature as of September 2018.

| EXON MUTATIONS              |                   |                                                                                |                                                  |                   |                                                                                      |                        |
|-----------------------------|-------------------|--------------------------------------------------------------------------------|--------------------------------------------------|-------------------|--------------------------------------------------------------------------------------|------------------------|
| Nukleotide change           | Amino acid change | Number of patients<br>(if less than all,<br>number with available<br>lab data) | Clin Var                                         | Mutation Taster   | Medical literature                                                                   | Phenotype              |
| nonsynonymous substitutions |                   |                                                                                |                                                  |                   |                                                                                      |                        |
| c.40 A>G                    | T14A              | 1                                                                              | NA                                               | probably harmless | benign (1)                                                                           | PHPT                   |
| c.55G>A                     | A19T              | 1                                                                              | another mutation in this aa is likely benign     | disease causing   |                                                                                      | PHPT                   |
| c.92A>G                     | D31G              | 1                                                                              | NA                                               | disease causing   |                                                                                      | FHH                    |
| c.188A>G                    | Y63C              | 1                                                                              | NA                                               | disease causing   |                                                                                      | FHH                    |
| c.207G>A                    | R69H              | 1                                                                              | likely pathogenic                                | disease causing   | other mutation affecting the same aa found in patient with FHH (2)                   | FHH                    |
| c.221T>C                    | M74T              | 1                                                                              | -                                                | disease causing   | novel                                                                                | FHH <sup>u</sup>       |
| c.242T>C                    | I81T              | 1 (0)                                                                          | -                                                | disease causing   | found in patient with FHH (3)                                                        |                        |
| c.310T>G                    | V104P             | 1                                                                              | -                                                | disease causing   | novel, but other mutation affecting the same aa found in patient with ADH (2)        | FHH                    |
| c.377A>T                    | D126V             | 3 (2)                                                                          | -                                                | disease causing   | recently described (4)                                                               | ADH                    |
| c.437G>A                    | G146D             | 2                                                                              | -                                                | disease causing   | novel                                                                                | FHH <sup>u</sup>       |
| c.513C>A                    | S171R             | 1                                                                              | uncertain significance                           | disease causing   | found in patient with FHH (5) other mutation affecting the same aa cause disease (6) | FHH                    |
| c.644A>G                    | D215G             | 1                                                                              | another mutation in this aa is likely pathogenic | disease causing   |                                                                                      | FHH                    |
| c.658C>G                    | R220W             | 4 (1)                                                                          | NA                                               |                   | found in patients with FHH (2,7)                                                     | FHH                    |
| c.691G>A                    | E231K             | 2                                                                              | -                                                | disease causing   | novel                                                                                | ADH                    |
| c.741_742insT               | D248*             | 1                                                                              | -                                                | disease causing   | novel                                                                                | FHH <sup>u</sup>       |
| c.748G>A                    | E250K             | 2(1)                                                                           | likely benign                                    | probably harmless | benign (8), FHH (2)                                                                  | normal                 |
| c.848T>C                    | I283T             | 1(0)                                                                           | conflicting interpretations                      | disease causing   | Found in patient with PHPT (9)                                                       |                        |
| c.862A>G                    | I288V             | 1                                                                              | -                                                | disease causing   | found in patient with FHH (2)                                                        | FHH <sup>u</sup>       |
| c.903_903delC               | S302Pfs*          | 4                                                                              | -                                                | disease causing   | novel                                                                                | FHH <sup>u</sup>       |
| c.1015C>T                   | P339S             | 1                                                                              | -                                                | disease causing   | novel                                                                                | FHH                    |
| c.1056G>A                   | W352*             | 3                                                                              | -                                                | disease causing   | found in several patients with clinical signs of FHH (6)                             | FHH <sup>u</sup>       |
| c.1189G>A                   | G397R             | 2                                                                              | uncertain significance                           | disease causing   | found in several families with FHH (6)                                               | FHH/atypical phenotype |
| c.1253A>G                   | Y418C             | 1                                                                              | -                                                | disease causing   | novel                                                                                | FHH                    |
| c.1283C>A, c.492+5T>A       | A428D, intron     | 1                                                                              | -                                                | disease causing   | novel                                                                                | FHH                    |
| c.1389C>A                   | H463Q             | 1                                                                              | NA                                               | disease causing   |                                                                                      | PHPT/FHH               |
| c.1393C>T                   | R465W             | 1                                                                              | uncertain significance                           | disease causing   | other mutation affecting the same aa cause disease (10)                              | FHH                    |
| c.1406T>G                   | F469C             | 1                                                                              | NA                                               | disease causing   |                                                                                      | FHH light              |
| c.1479C>A                   | N493K             | 1                                                                              | NA                                               | disease causing   |                                                                                      | PHPT                   |
| c.1525G>A                   | G509R             | 1                                                                              | pathogenic                                       | disease causing   | found in family with FHH (6)                                                         | FHH                    |
| c.1663A>G                   | I555V             | 1                                                                              | NA                                               | disease causing   | found in patient with FHH (6)                                                        | FHH <sup>u</sup>       |
| c.1680C>G, c.1681T>G        | C561G, T560T      | 1(0)                                                                           | -                                                | disease causing   | novel                                                                                |                        |
| c.1837G>A                   | G613R             | 1                                                                              | likely pathogenic                                | disease causing   |                                                                                      | FHH                    |
| c.1970C>A                   | S657Y             | 1                                                                              | -                                                | disease causing   | novel                                                                                | FHH                    |
| c.2039G>A <sup>a</sup>      | R680H             | 1                                                                              | uncertain significance                           | disease causing   | other mutation affecting the same aa found in patient with NSHPT (2)                 | FHH <sup>u</sup>       |

| Nukleotide change      | Amino acid change | Number of patients | Clin Var        | Mutation Taster   | Medical literature            | Phenotype              |
|------------------------|-------------------|--------------------|-----------------|-------------------|-------------------------------|------------------------|
| c.2089G>A              | V697M             | 1                  | -               | disease causing   | novel                         | FHH                    |
| c.2224T>C              | W742R             | 1                  | -               | disease causing   | found in patient with FHH (6) | FHH                    |
| c.2345T>G              | L782R             | 1                  | -               | disease causing   | novel                         | FHH                    |
| c.2383_2383delC        | R795Gfs*          | 1(0)               | -               | disease causing   | found in family with FHH (6)  |                        |
| c.2607C>G <sup>a</sup> | I869M             | 1                  | -               | disease causing   | novel                         | FHH light <sup>u</sup> |
| c.2649_2650insGCT      | A884dup           | 1                  | -               | disease causing   | novel                         | FHH                    |
| c.2785A>G              | R929G             | 1                  | -               | probably harmless | novel                         | PHPT <sup>u</sup>      |
| c.2956G>T              | A986S             | 1                  | other - variant | probably harmless | a frequent variant (2)        | PHPT                   |
| c.3220A>G              | N1074D            | 1                  | NA              | disease causing   |                               | normal                 |

synonymous substitutions

|                       |       |                        |                 |                 |                                   |                   |
|-----------------------|-------|------------------------|-----------------|-----------------|-----------------------------------|-------------------|
| c.78 C>G              | A26A  | 2                      | benign          | disease causing |                                   | PHPT/SHPT         |
| c.114T>C              | F38F  | 1                      | probably benign | disease causing |                                   | normal            |
| c.537A>G              | E179E | 1                      | benign          | disease causing |                                   | FHH <sup>u</sup>  |
| c.573G>A              | E191E | 3                      | likely benign   | disease causing | found in PHPT patient (9)         | PHPT              |
| c.819C>G              | G273G | 1                      | -               | disease causing | novel                             | FHH light         |
| c.906C>T <sup>a</sup> | S302S | 1(0)                   | -               | disease causing | novel                             |                   |
| c.1338T>C             | N446N | 1                      | NA              | disease causing |                                   | PHPT <sup>u</sup> |
| c.2064C>T             | F688F | 1(0)                   | likely benign   | disease causing | found in reference population (9) |                   |
| c.2610G>A             | E870E | 17(16) +3 <sup>a</sup> | benign          | disease causing | found in reference population (9) | PHPT/normal       |

INTRON MUTATIONS

| Nukleotide change | Number of patients | Clin Var | Human Splicing Finder |                                      | Phenotype <sup>a</sup> |
|-------------------|--------------------|----------|-----------------------|--------------------------------------|------------------------|
| c.1608+2T>A       | 1                  | -        | disease causing       | change of splicesite, frameshift     | FHH <sup>u</sup>       |
| c.492+57G>A       | 1                  | -        | probably harmless     | probably not affecting gene splicing | PHPT                   |
| c.-9 G>A          | 1                  | NA       | probably harmless     | -                                    | PHPT <sup>u</sup>      |
| c.186-69G>A       | 1                  | -        | disease causing       | possible change of splice site       | FHH                    |
| c.186-64G>A       | 1                  | -        | probably harmless     | possible change of splice site       | FHH light              |
| c.1733-4A>G       | 1                  | -        | disease causing       | probably not affecting gene splicing | PHPT                   |

Total Numbers:

|                           |     |
|---------------------------|-----|
| Different mutations:      | 58  |
| Patients with a mutation: | 91  |
| Patients sequenced:       | 822 |

Legend to Supplementary Table S1.

Table show all CASR-mutations found in in our laboratory between year 2005 and September 2018. Nukleotide- as well as amino acid changes are shown. The nomenclature is based on the reference sequence NM\_000388.3; the nucleotide numbers starts with the A of the ATG translation-initiation site as base 1.

The phenotype-column indicates the most probable phenotype based on available lab results in the current laboratory software system (containing data from 2009). Laboratory data were not available for all patients as some of them are external patients from other Hospital Regions and others might have been diagnosed before 2009. If lab data were not avilable for all patients with a certain mutaion, the number of patients with available lab data is shown in paranthesis in the number of patients column. Urinary calcium:creatinine clearance ratio was available for some patients, marked with a <sup>u</sup>. It is important to note, that phenotype categorization might not be the same as the final clinical diagnosis, as only biochemical data and no clinical information as for example anamnestic data, family history or results from parathyroid scintigraphy have been used in preparing this table.

Several different in silico tools not shown in table have been used at the time for analysis and interpretation of each found mutation. Here, in silico interpretations from Mutation taster ([www.mutationtaster.org](http://www.mutationtaster.org)) as of September 2018 are shown as an example, as well as information from the ClinVar archive (<https://www.ncbi.nlm.nih.gov/clinvar/>) and references to peer reviewed papers in international journals. The intron mutations are also evaluated through Human splicing finder (<http://www.umd.be/HSF3/index.html>). In the material, we see several conflicts between in silico interpretations and the patient phenotype, especially Mutation taster is restrictive with excluding known variants from being possibly disease causing, as it demands observations of all three genotypes (heterozygous, homozygous and wild-type) in unaffected individuals, in order to exclude a damaging effect of the allele. This complexity illustrates the importance of clinical and laboratory investigation.

Abbreviations: aa, aminoacid; ADH, Autosomal dominant hypocalcemia; FHH, Familial hypocalciuric hypercalcemia; FHH light, a "light" version of FHH with normal to mildly elevated plasma calcium and normal PTH (parathyroid hormone); normal, normocalcemia and normal PTH; NA, information not available; NSHPT, Neonatal severe primary hyperparathyroidism; PHPT, Primary hyperparathyroidism; SHPT, secondary hyperparathyroidism. <sup>a</sup> Three of the patients with other mutations also had a coincidental mutation E870E.

References:

1. Pidasheva S, Canaff L, Simonds WF, Marx SJ, Hendy GN. Impaired cotranslational processing of the calcium-sensing receptor due to signal peptide missense mutations in familial hypocalciuric hypercalcemia. *Hum Mol Genet.* 2005;14(12):1679–90.
2. Hannan FM, Nesbit MA, Zhang C, Cranston T, Curley AJ, Harding B, et al. Identification of 70 calcium-sensing receptor mutations in hyper- and hypo-calcaemic patients: Evidence for clustering of extracellular domain mutations at calcium-binding sites. *Hum Mol Genet.* 2012;21(12):2768–78.
3. Nissen PH, Christensen SE, Ladefoged SA, Brixen K, Heickendorff L, Mosekilde L. Identification of rare and frequent variants of the CASR gene by high-resolution melting. *Clin Chim Acta. Elsevier B.V.;* 2012;413(5–6):605–11.
4. Rasmussen AQ, Jørgensen NR, Schwarz P. Identification and Functional Characterization of a Novel Mutation in the Human Calcium-Sensing Receptor That Co-Segregates With Autosomal-Dominant Hypocalcemia. *Front Endocrinol (Lausanne).* 2018 Apr 25;9(April):1–10.
5. Vargas-Poussou R, Mansour-Hendili L, Baron S, Bertocchio JP, Travers C, Simian C, et al. Familial hypocalciuric hypercalcemia types 1 and 3 and primary hyperparathyroidism: Similarities and differences. *J Clin Endocrinol Metab.* 2016;
6. Nissen PH, Christensen SE, Heickendorff L, Brixen K, Mosekilde L. Molecular genetic analysis of the calcium sensing receptor gene in patients clinically suspected to have familial hypocalciuric hypercalcemia: phenotypic variation and mutation spectrum in a Danish population. *J Clin Endocrinol Metab.* 2007;92(11):4373–9.
7. Guarnieri V, Canaff L, Yun FHJ, Scillitani A, Battista C, Muscarella LA, et al. Calcium-Sensing Receptor (CASR) mutations in hypercalcemic states: Studies from a single endocrine clinic over three years. *J Clin Endocrinol Metab.* 2010;95(4):1819–29.
8. Fukumoto S, Chikatsu N, Okazaki R, Takeuchi Y, Tamura Y, Murakami T, et al. Inactivating mutations of calcium-sensing receptor results in parathyroid lipohyperplasia. *Diagnostic Mol Pathol.* 2001;10(4):242–7.
9. Frank-Raue K, Leidig-Bruckner G, Haag C, Schulze E, Lorenz A, Schmitz-Winnenthal H, et al. Inactivating calcium-sensing receptor mutations in patients with primary hyperparathyroidism. *Clin Endocrinol (Oxf).* 2011;75(1):50–5.
10. Leech C, Lohse P, Stanojevic V, Lechner A, Göke B, Spitzweg C. Identification of a novel inactivating R465Q mutation of the calcium-sensing receptor. *Biochem Biophys Res Commun.* 2006;342(3):996–1002.
